# Supplementary material
Source: publisher figshare collection journal article supplement (https://rs.figshare.com/ndownloader/files/12544559)
Supplement: Supplementary file 1 [file 12544559]

## Sheet: S1_pop_var
Table S1. Sampling and MHC class I variation.
Taxa: Lg - Lissotriton graecus, Lk - Lissotriton kosswigi, Lm - L. montandoni, Ls - L. schmidtleri, Lva - L. vulgaris ampelensis, NLvv - Northern L. v. vulgaris.
N - sample size, NA - number of MHC class I alleles detected, AR - allelic richness, number of alleles adjusted to the sample size of 16 individuals
NPriv - number of alleles private to a population; NA/ind - mean number of alleles per individual
								MHC
Population	Group	Taxon	Longitude E	Latitude N	NBS11 & CR	NTAP1	NMHC	NA	AR	NPriv	NA/ind
Demirbey3	South	Lk	30.4935	40.8495	20	20	20	46	43.995	7	11.45
Denizli2	South	Lk	29.5642	40.8932	20	20	20	46	44.339	7	10.05
Gjonce	South	Lg	19.655	40.5544	20	20	20	70	62.193	53	9.25
Kocabei	South	Ls	28.2168	39.3521	16	16	17	34	33.552	12	9.94118
Kuyumculu	South	Lk	30.7886	41.0574	20	20	20	54	51.234	17	11.65
Mollafeneri2	South	Lk	29.5076	40.8931	20	20	20	41	38.795	6	10.45
Ostar Kamak2	South	Ls	25.85	41.881	20	20	19	53	51.397	7	12.8421
Paliambela	South	Lg	20.97	38.9087	20	20	20	60	54.783	49	10.05
Sagaiika	South	Lg	21.4691	38.1041	20	20	19	37	35.729	27	9.21053
Subasi	South	Ls	28.5359	40.2598	16	15	16	47	47	21	11.8125
Thavmako	South	Lg	22.2763	39.145	20	20	20	36	33.744	21	10.1
Tulovo	South	Ls	25.546	42.562	18	18	18	43	42.399	4	12.5556
South average							19.0833	47.25	44.93	19.25	10.7802
Băsăşti	North	NLvv	26.6088	46.647			20	86	78.31	5	13.05
Brădătel	North	NLvv	26.1778	47.4905	20	20	20	65	60.104	4	12.5
Ciolanu	North	NLvv	26.551	45.2374	19	19	19	99	91.411	23	14.7895
Harsany	North	Lva	20.7628	48.0133	20	20	20	89	81.202	19	12.2
Joseni1	North	Lva	25.4343	46.7308			20	89	79.587	5	11.75
Mănăşturel	North	Lva	23.9266	47.1895	20	20	20	93	84.742	22	11.9
Olaszliszka	North	Lva	21.4139	48.2299	20	20	20	92	81.052	23	11.45
Pădureni	North	NLvv	26.7881	46.5633	20	20	20	66	60.506	1	11.5
Remetea1	North	Lva	25.4246	46.7901			20	72	67.775	0	12.9
Rosilna	North	NLvv	24.3377	48.7957	20	20	20	79	72.679	9	13.3
Valea Ierii	North	Lva	23.3554	46.6504	20	20	20	79	73.861	19	13.15
North average							19.9091	82.6364	75.5663	11.8182	12.59
Bolătău	Mon	Lm	26.3763	46.6418	20	20	20	96	85.762	4	11.3
Holda	Mon	Lm	25.6664	47.2654	20	20	20	94	84.069	2	11.05
Lachowice	Mon	Lm	19.4188	49.6832	20	20	20	101	92.701	8	12.25
Lăpuşna1a	Mon	Lm	25.2206	46.7661			11	77	97.4	3	12.8182
Lăpuşna2a	Mon	Lm	25.2434	46.7677			8	62		2	12.5
Lăpuşna3	Mon	Lm	25.2715	46.771			19	103	93.772	2	12.1053
Pasul Pascanu	Mon	Lm	25.5194	47.5735	20	20	20	128	112.489	18	11.85
Predeal	Mon	Lm	25.5587	45.4895	20	20	20	64	60.088	5	10.4
Rakovets	Mon	Lm	24.0396	49.6349	20	20	20	59	56.765	7	12.2
Tazlău10	Mon	Lm	26.3523	46.7039			20	103	94.072	5	11.95
Vyshkivsky Pass	Mon	Lm	23.6345	48.7011	20	20	20	144	125.977	21	13.95
Zbyny	Mon	Lm	22.9526	48.7997	20	20	20	109	95.885	19	12.5
Mon average							18.1667	95	90.8164	8	12.0728
a - to keep the minimum sample size for calculation of allelic richness at 16 individuals, these two nearby localities (distance < 2 km) were combined for calculation of allelic richness

## Sheet: S2 BS11 & CR
Table S2. Diversity of BS11 and CR genes
S - number of segregating sites per site calculated from the pool of all sequences; SD - standard deviation
π - nucleotide diversity per site
p and Tajima's D are given as means of per-population values
	Resequenced bp	S ± SD	π ± SD	Tajima's D ± SD
APP	554.5	0.1	4.6E-04 ± 2.4E-04	0.07 ± 0.99
AQP9	241.714	0.09	8.5E-04 ± 5.5E-04	0.40 ± 0.65
BCL3	500.5	0.2	2.4E-03 ± 1.4E-03	0.22 ± 1.12
CD40LG	269.857	0.12	2.5E-03 ± 1.6E-03	0.47 ± 1.06
ELK1	513.571	0.22	2.4E-03 ± 1.3E-03	-0.12 ± 1.07
IL17RD	897.107	0.19	2.5E-03 ± 1.2E-03	0.13 ± 1.02
NBN	498.786	0.15	1.1E-03 ± 6.6E-04	0.21 ± 1.25
NFE2L2	1244.32	0.14	3.2E-03 ± 1.4E-03	0.58 ± 1.12
SOCS3	1406.54	0.09	1.4E-03 ± 8.4E-04	-0.16 ± 1.10
SQSTM1	685.714	0.12	1.8E-03 ± 1.8E-03	-0.24 ± 1.12
USP7	575.214	0.03	5.8E-05 ± 6.0E-05	-0.23 ± 0.69
BS11	7388	0.13 ± 0.05	1.7E-03 ± 6.6E-04	0.12 ± 0.42
	(672 ± 353)
CR	20879	0.11 ± 0.05	2.5E-04 ± 9.5E-05	-0.01 ± 0.17
	(136 ± 65)

## Sheet: S3_sims
Table S3. Demographic parameters used in coalescent and forward simulations of six Lissotriton vulgaris complex lineages according to the model in Fig. 3.
Parameter values are based on inferences of Pabijan et al. (2017), except migration rates that were taken from Zieliński et al. (2016)
Time is given in number of generations, either backward in time (coalescent simulations) or forward in time (forward simulations).
Parameter values in forward simulations were rescaled by the factor of 100.
N0, Nanc etc. are effective population sizes (Ne) of respective populations/lineages
SOD - symmetric overdominance; NFD - negative frequency dependence
In models with migration, identical per gene copy per generation migration rates Lm-NLvv, Lm-Lva and Lva-NLvv were used and three migration rates (m1-m3) were evaluated
Parameter	Parameter description	Scenario
		i: Neutrality; coalescent simulations	ii) Neutrality, Ne*6.8; coalescent simulations	iii) SOD, and iv) NFD; forward simulations
N0	Ancestral population of all L. vulgaris complex lineages and the outgroup (L. helveticus)	100000	680000	NA
Nanc	Ancestral population of L. montandoni and vul1	254995	1733966	2550
Nvul1	Ancestral population of vul2, Lg and Lk	163035	1108638	1630
Nvul2	Ancestral population of NLvv, Lva and Lvs	279941	1.9036e+06	2800
NLm	L. montandoni	153473	1.04362e+06	1535
NLk	L. kosswigi	149062	1.01362e+06	1491
NLg	L. graecus	337555	2295374	3376
NNLvv	North L. vulgaris vulgaris	268313	1.82453e+06	2683
NLva	L. v. ampelensis	475432	3.23294e+06	4754
NLs	L. schmidtleri	144712	984042	1447
NLh	L. helveticus	100000	680000	NA
T0	End of forward simulations	NA	NA	40403
T1	Time of split of NLvv, Lva and Lvs	703388	703388	33369
T2	Time of split of vul2, Lg and Lk	1.3436e+06	1.3436e+06	26967
T3	Time of split of vul1 and Lm	1540290	1540290	25000
T4	Time of split of anc and Lh	4600000	4600000	NA
Tmig	Time of migration stop or start (coalescent and forward simulations, respectively)	12000	12000	40285
m1	Low migration rate	5e-07	5e-07	5e-05
m2	Intermediate migration rate	1.8e-06	1.8e-06	NA
m3	High migration rate	2.36e-06	2.36e-06	0.000236
r	Recombination rate between two adjacent sites per generation	6e-09	6e-09	6e-07

## Sheet: S4_sel
Table S4. Results of PAML analysis of selection models for MHC class I.
For each category of alleles (All, LEX, HEX) 10 batches of 100 randomly picked alleles each were used to estimate likelihoods of three models of sequence evolution.
M0 - model assuming a single dN/dS (omega) value for all codons
M7 - model assuming variation of omega among codons, but no positive selection
M8 - model assuming variation of omega among codons and allowing omega > 1 for a fraction of codons (positive selection)
The DAIC values calculated as the averages of 10 replicates are given in the table.
	DAIC
	All	HEX	LEX
M0	918.813	1074.45	131.803
M7	104.88	138.675	5.57818
M8	best	best	best

## Sheet: S5_seq_div
Table S5. Sequence divergence between MHC class I alleles.
Nucleotide - Tamura-Nei (1993) distance; amino acid - Poisson corrected distance; dN, dS - nonsynonymous and synonymous divergence (Nei & Gojobori 1986)
All distances are given as percentages; standrad errors (SE) were calculated with 100 bootstrap replicates
ABS - codons corresponding to the Antigen Binding Sites common to HLA-A, B and C genes
	nucleotide		amino acid		dN		dS		Z test of selection (2-sided)
	mean	SE	mean	SE	mean	SE	mean	SE	Z	P	selection mode
All alleles (N = 899)
All codons	19.1	1.6	31.4	3.9	17.7	2.9	22	2.4	-2.393	0.018	purifying
ABS	40.6	16.1	50.6	25.3	44.1	15.7	15.2	7.6	2.792	0.006	positive/balancing
nonABS	17.3	3	23.5	6.3	13.3	4.4	30.9	5.9	-3.102	0.002	purifying
HEX (putative classical functional, N = 658)
All codons	24.6	2.1	40.3	4.8	21.6	3	33.3	4.4	-2.383	0.019	purifying
ABS	39.1	16.6	44.9	22.4	31.2	12.8	11.7	5.9	1.874	0.063	positive/balancing
nonABS	12.4	2.5	16.7	4.8	9.4	3.4	19.2	5	-2.074	0.04	purifying
LEX (putative nonclassical/nonfunctional, N = 241)
All codons	25.3	4.3	31.3	8.2	17.4	4.9	48.7	9	-3.506	0.001	puryfing
ABS	35.8	22.1	52.6	26.4	54.5	11.9	22.3	10.7	2.832	0.005	positive/balancing
nonABS	23.5	4.2	27.7	8.5	15.2	4.3	49.1	9	-3.184	0.002	puryfing

## Sheet: S6_all_sharing
Table S6. Sharing of MHC class I and TAP1 alleles between geographic groups.
Percentage of alleles present in the group in a column that are shared with the group in a row
Results for all MHC class I alleles and only for putative functional classical (HEX) alleles are shown
Results for TAP1 are averaged over five exons
MHC class I - All alleles
	Mon	North	South
Mon (416 alleles)		61.5	7.2
North (416 alleles)	61.5		7.7
South (356 alleles)	8.4	9
MHC class I - HEX alleles
	Mon	North	South
Mon (329 alleles)		57.4	5.8
North (305 alleles)	62		6.9
South (246 alleles)	7.7	8.5
TAP1
	Mon	North	South
Mon		51.5	18.4
North	68		27.5
South	15.1	18

## Sheet: S7_MeanFst
Table S7. Fst values between three population groups in MHC class I genes.
Stars indicate values significantly smaller than the next higher value as estimated with randomization test for 28 (or 35) populations.
* P < 0.05, ** P < 0.01, *** P < 0.001. The smallest value in each row is in bold
	North-South	Mon-North	Mon-South
MHC class I all alleles
35 populations	0.279	0.147***	0.234
28 populations	0.276	0.152**	0.233
6 lineages (significance not tested)	0.143	0.058	0.105
MHC class I HEX alleles
35 populations	0.251	0.139**	0.207
28 populations	0.252	0.144*	0.205

## Sheet: S8_Fst_BS11CR
Table S8. Pairwise Fst values between populations.
Above diagnonal - CR genes; below diagonal - BS11 genes
		South												North								Mon
		Demirbey3	Denizli2	Gjonce	Kocabei	Kuyumculu	Mollafeneri2	Ostar Kamak2	Paliambela	Sagaiika	Subasi	Thavmako	Tulovo	Brădătel	Ciolanu	Harsany	Mănăşturel	Olaszliszka	Pădureni	Rosilna	Valea Ierii	Bolătău	Holda	Lachowice	Pasul Pascanu	Predeal	Rakovets	Vyshkivsky Pass	Zbyny
South	Demirbey3	0	0.0612053	0.413848	0.563909	0.0257388	0.0825323	0.447333	0.453288	0.467754	0.512192	0.486196	0.445881	0.399532	0.366812	0.291348	0.347751	0.35208	0.399243	0.312024	0.320911	0.566337	0.541916	0.595224	0.52038	0.571822	0.579551	0.535527	0.563271
	Denizli2	0.163612	0	0.412315	0.561921	0.0604313	0.0130984	0.455453	0.428798	0.428248	0.508683	0.479368	0.453554	0.397504	0.363622	0.282094	0.347675	0.342747	0.388778	0.309904	0.304432	0.539467	0.529903	0.579648	0.506183	0.557386	0.561009	0.525667	0.551812
	Gjonce	0.498565	0.422527	0	0.538559	0.4382	0.466401	0.456247	0.124266	0.22729	0.497949	0.10748	0.453668	0.397843	0.34934	0.259007	0.329483	0.320064	0.378845	0.316536	0.282094	0.457125	0.439136	0.491208	0.414753	0.471981	0.474879	0.432315	0.462032
	Kocabei	0.615557	0.511463	0.569303	0	0.621392	0.650109	0.327401	0.576705	0.639956	0.173128	0.650402	0.351402	0.483414	0.437181	0.411954	0.470129	0.469679	0.47854	0.399639	0.427215	0.64508	0.642642	0.689306	0.618239	0.649124	0.668101	0.63225	0.661761
	Kuyumculu	0.0568963	0.166799	0.530917	0.667971	0	0.0878715	0.491656	0.485124	0.492472	0.556694	0.522358	0.488662	0.426001	0.388475	0.313131	0.382739	0.380259	0.416837	0.326929	0.340469	0.578719	0.561491	0.625232	0.530498	0.584161	0.605284	0.559259	0.586206
	Mollafeneri2	0.204277	0.0126897	0.45828	0.591021	0.212423	0	0.531528	0.516027	0.514371	0.597034	0.560116	0.524478	0.43332	0.403574	0.323982	0.393875	0.387348	0.427782	0.335592	0.34304	0.578656	0.562289	0.625061	0.534148	0.589997	0.60449	0.566866	0.596415
	Ostar Kamak2	0.498381	0.375343	0.476264	0.357399	0.546444	0.444139	0	0.487307	0.527048	0.267299	0.541874	0.0523116	0.37993	0.344198	0.308849	0.368445	0.363852	0.380285	0.290183	0.322307	0.567895	0.567036	0.629821	0.544114	0.572661	0.588287	0.557855	0.590665
	Paliambela	0.548203	0.472515	0.228214	0.615973	0.568869	0.507537	0.508981	0	0.169521	0.528311	0.243677	0.489357	0.43137	0.383876	0.298022	0.364315	0.354856	0.42608	0.350864	0.320035	0.510717	0.498286	0.535719	0.464833	0.514048	0.514775	0.480312	0.503357
	Sagaiika	0.564683	0.479859	0.21492	0.620276	0.59652	0.519025	0.517737	0.276287	0	0.580566	0.352688	0.532481	0.467403	0.410863	0.326131	0.404649	0.389424	0.467732	0.376031	0.359519	0.532212	0.526521	0.553412	0.489502	0.546455	0.544801	0.499668	0.525994
	Subasi	0.604143	0.4942	0.568213	0.180521	0.601075	0.519343	0.304752	0.621519	0.617529	0	0.591465	0.272549	0.436486	0.403413	0.373447	0.434649	0.438143	0.43857	0.359909	0.390337	0.615379	0.604541	0.655745	0.580366	0.621577	0.627677	0.595353	0.622551
	Thavmako	0.573699	0.47979	0.0935187	0.636531	0.608111	0.524173	0.520876	0.319058	0.364557	0.622567	0	0.550139	0.464075	0.415222	0.33058	0.398532	0.394538	0.451669	0.370248	0.353981	0.532719	0.517247	0.579504	0.488342	0.546173	0.55717	0.509974	0.545203
	Tulovo	0.573872	0.444072	0.496724	0.389882	0.58455	0.486244	0.159773	0.550578	0.527229	0.314592	0.554166	0	0.390359	0.355879	0.322052	0.374051	0.376186	0.386587	0.306791	0.339039	0.569364	0.564138	0.615735	0.547096	0.571859	0.589949	0.559063	0.586056
North	Brădătel	0.493157	0.42523	0.424094	0.431158	0.525257	0.458232	0.304995	0.458216	0.46062	0.375814	0.465297	0.335374	0	0.0725145	0.261262	0.301574	0.300974	0.0436707	0.0405195	0.273931	0.53927	0.532543	0.570538	0.519455	0.520552	0.555157	0.528375	0.543466
	Ciolanu	0.444076	0.369611	0.373082	0.321409	0.466284	0.394036	0.214856	0.424805	0.434018	0.303295	0.400874	0.245974	0.0743507	0	0.225037	0.257989	0.269323	0.0403015	0.0838026	0.236697	0.490658	0.483064	0.52515	0.478146	0.47658	0.515546	0.49437	0.505612
	Harsany	0.405903	0.329305	0.274679	0.395299	0.422183	0.347195	0.281573	0.337161	0.308961	0.390589	0.308513	0.303222	0.250829	0.21057	0	0.156934	0.0718832	0.246534	0.203902	0.113022	0.420788	0.407933	0.444357	0.400789	0.415403	0.426758	0.404755	0.418147
	Mănăşturel	0.414104	0.314219	0.377192	0.433046	0.414538	0.336387	0.281243	0.429676	0.431658	0.421818	0.425197	0.351177	0.256814	0.221265	0.187553	0	0.189016	0.285901	0.236859	0.0552692	0.443169	0.439541	0.484563	0.426464	0.435502	0.466953	0.442258	0.46038
	Olaszliszka	0.494159	0.421062	0.321039	0.49216	0.519201	0.460581	0.388356	0.424617	0.358073	0.475268	0.374816	0.384337	0.332153	0.268659	0.0951168	0.258012	0	0.290171	0.243713	0.147066	0.463631	0.462969	0.489795	0.44873	0.461572	0.468989	0.446851	0.467303
	Pădureni	0.457603	0.396308	0.391661	0.401523	0.479891	0.416912	0.293372	0.429313	0.441482	0.387081	0.433984	0.32732	0.0582492	0.0412719	0.234703	0.259186	0.30798	0	0.0667026	0.26615	0.526536	0.515384	0.569311	0.506388	0.514753	0.550031	0.527242	0.541701
	Rosilna	0.438853	0.365472	0.365491	0.356309	0.456883	0.390195	0.233641	0.410344	0.403558	0.338184	0.397932	0.275179	0.0340465	0.0796655	0.212382	0.224029	0.269355	0.0855043	0	0.218222	0.431826	0.429119	0.462242	0.415307	0.421321	0.450655	0.427327	0.439707
	Valea Ierii	0.398542	0.302834	0.326359	0.426743	0.403693	0.32796	0.275552	0.386055	0.36075	0.418742	0.375374	0.325851	0.244878	0.202075	0.144468	0.031339	0.205269	0.238434	0.209087	0	0.415391	0.406218	0.453932	0.397254	0.404937	0.435413	0.407322	0.425988
Mon	Bolătău	0.53351	0.455428	0.329187	0.531841	0.558854	0.493807	0.436291	0.438792	0.401735	0.517563	0.38365	0.426597	0.345329	0.277807	0.240906	0.344243	0.298029	0.295764	0.27687	0.295551	0	0.0326398	0.137197	0.0393922	0.0301218	0.131529	0.100386	0.119439
	Holda	0.512659	0.431903	0.331462	0.524867	0.528203	0.466553	0.430674	0.424522	0.400886	0.511685	0.387184	0.430768	0.334442	0.295098	0.249806	0.342453	0.327024	0.307083	0.281801	0.297509	0.0454541	0	0.119152	0.0169501	0.0599101	0.112574	0.0817396	0.0982161
	Lachowice	0.624801	0.539369	0.452546	0.660338	0.65068	0.585927	0.561433	0.580813	0.595737	0.647561	0.573749	0.55201	0.455895	0.39733	0.327446	0.439604	0.374127	0.412258	0.365934	0.382486	0.137477	0.170243	0	0.100966	0.145497	0.0810082	0.0506685	0.0360863
	Pasul Pascanu	0.540595	0.468	0.335046	0.562195	0.568295	0.508975	0.468874	0.454362	0.449588	0.546208	0.428079	0.450596	0.38038	0.32317	0.265432	0.377011	0.31221	0.326959	0.307231	0.320651	0.0433154	0.017052	0.149682	0	0.0644705	0.104611	0.0669373	0.0832973
	Predeal	0.547904	0.469811	0.369452	0.557255	0.571637	0.507399	0.467435	0.469451	0.437138	0.543935	0.430497	0.461194	0.375346	0.310841	0.267706	0.368144	0.318543	0.32336	0.301775	0.314477	0.0284373	0.0623225	0.172992	0.0665395	0	0.151069	0.118029	0.139719
	Rakovets	0.594642	0.512144	0.409825	0.599945	0.615079	0.548034	0.515637	0.508846	0.461923	0.581778	0.476867	0.515371	0.418553	0.383756	0.298756	0.414962	0.350715	0.393317	0.336808	0.357644	0.12919	0.130394	0.133157	0.111733	0.152633	0	0.0396722	0.0418356
	Vyshkivsky Pass	0.56479	0.485383	0.375187	0.571303	0.583191	0.523245	0.48545	0.48718	0.443357	0.556572	0.436299	0.4706	0.392301	0.331718	0.275751	0.380425	0.327995	0.345646	0.316106	0.332549	0.0783556	0.0880369	0.0629525	0.0731947	0.108736	0.0436442	0	0.0133378
	Zbyny	0.57262	0.500968	0.379901	0.59486	0.594778	0.538836	0.510862	0.494753	0.449361	0.577444	0.445565	0.492011	0.414174	0.344803	0.292616	0.403943	0.343694	0.355833	0.335194	0.351925	0.0791758	0.0994609	0.0460275	0.0809622	0.113223	0.0504197	0.0131982	0

## Sheet: S9_Fst_MHC
Table S9. Pairwise Fst values between populations in MHC class I
Below diagonal - all alleles; above diagonal - HEX alleles
		South												North											Mon
		Demirbey3	Denizli2	Gjonce	Kocabei	Kuyumculu	Mollafeneri2	Ostar Kamak2	Paliambela	Sagaiika	Subasi	Thavmako	Tulovo	Băsăşti	Brădătel	Ciolanu	Harsany	Joseni1	Mănăşturel	Olaszliszka	Pădureni	Remetea1	Rosilna	Valea Ierii	Bolătău	Holda	Lachowice	Lăpuşna1	Lăpuşna2	Lăpuşna3	Pasul Pascanu	Predeal	Rakovets	Tazlău10	Vyshkivsky Pass	Zbyny
South	Demirbey3	0	0.22693	0.28217	0.41306	0.22222	0.24748	0.32258	0.28414	0.3755	0.31491	0.41236	0.37569	0.27464	0.29338	0.26657	0.27803	0.27768	0.26105	0.28747	0.29346	0.29342	0.28146	0.29453	0.24892	0.24456	0.23016	0.25524	0.27717	0.23361	0.19243	0.27444	0.31522	0.23169	0.20565	0.2163
	Denizli2	0.21687	0	0.21718	0.34997	0.1646	0.0624	0.27248	0.21415	0.30274	0.24308	0.36315	0.32699	0.23178	0.25172	0.22571	0.22121	0.22937	0.20051	0.23963	0.24683	0.24138	0.22536	0.24015	0.19416	0.19192	0.17587	0.19351	0.21244	0.17286	0.13397	0.21434	0.26337	0.17505	0.15296	0.15122
	Gjonce	0.26601	0.23064	0	0.29766	0.23552	0.28538	0.21641	0.14372	0.27163	0.22667	0.24659	0.27286	0.20208	0.21913	0.19408	0.16947	0.15894	0.14749	0.17509	0.21421	0.18789	0.19895	0.18327	0.13161	0.13004	0.1184	0.13443	0.16175	0.12223	0.09213	0.1522	0.20101	0.11764	0.09093	0.11046
	Kocabei	0.42607	0.38395	0.33476	0	0.37815	0.42208	0.33726	0.30797	0.42719	0.25916	0.4401	0.39955	0.30785	0.32759	0.29055	0.28523	0.27579	0.26002	0.29651	0.33689	0.28877	0.30467	0.29887	0.24911	0.24883	0.23044	0.27701	0.31127	0.2411	0.20464	0.26752	0.3278	0.23122	0.20458	0.22927
	Kuyumculu	0.18943	0.20802	0.26018	0.41195	0	0.19485	0.29348	0.23677	0.33191	0.27759	0.38022	0.34608	0.24832	0.26115	0.24138	0.24104	0.24128	0.22296	0.24767	0.26267	0.2594	0.25095	0.26028	0.20845	0.2061	0.19378	0.21239	0.23699	0.18995	0.1532	0.23232	0.27905	0.19242	0.16542	0.17156
	Mollafeneri2	0.23703	0.03654	0.28846	0.4321	0.21962	0	0.32722	0.2766	0.36172	0.3091	0.42629	0.38267	0.27303	0.29139	0.2669	0.2836	0.28588	0.26261	0.28814	0.28759	0.29781	0.27555	0.3016	0.25082	0.2462	0.23486	0.25386	0.27623	0.22484	0.1832	0.27598	0.31948	0.23188	0.20497	0.20081
	Ostar Kamak2	0.30111	0.28248	0.21568	0.37224	0.28422	0.32684	0	0.2299	0.32373	0.25588	0.33708	0.15515	0.21629	0.2441	0.20581	0.21555	0.20638	0.17955	0.22327	0.23534	0.22241	0.22429	0.20453	0.18495	0.18452	0.16789	0.19411	0.18784	0.18696	0.13495	0.20002	0.24949	0.17444	0.14066	0.16833
	Paliambela	0.29375	0.2405	0.19242	0.3871	0.28181	0.29558	0.27474	0	0.27155	0.22048	0.30033	0.28364	0.20567	0.2226	0.19634	0.18034	0.17625	0.16143	0.19015	0.21682	0.2011	0.20309	0.19817	0.14602	0.1441	0.13357	0.14553	0.16894	0.13231	0.09983	0.16598	0.21532	0.13165	0.10151	0.11721
	Sagaiika	0.35042	0.29489	0.26047	0.44635	0.33459	0.34571	0.33088	0.25576	0	0.31681	0.41479	0.38036	0.27938	0.29442	0.2707	0.27133	0.2695	0.24929	0.28331	0.30007	0.28589	0.27522	0.28698	0.23668	0.23206	0.22027	0.24903	0.27598	0.21884	0.17636	0.26319	0.30884	0.21726	0.18875	0.19661
	Subasi	0.30445	0.25019	0.23588	0.23078	0.28289	0.29556	0.26974	0.26681	0.31918	0	0.35755	0.32056	0.22259	0.23598	0.22056	0.22637	0.22722	0.20195	0.23755	0.24494	0.24387	0.21847	0.23243	0.20004	0.19536	0.1752	0.19404	0.20736	0.18418	0.14456	0.2226	0.2543	0.18297	0.1454	0.16567
	Thavmako	0.39844	0.37262	0.28484	0.50169	0.36673	0.42493	0.33248	0.31069	0.41033	0.38174	0	0.39273	0.31707	0.33501	0.30284	0.28907	0.27887	0.26915	0.29811	0.3434	0.30016	0.31225	0.29844	0.25771	0.25297	0.24086	0.27648	0.30627	0.2523	0.21696	0.28852	0.32453	0.23868	0.20997	0.23869
	Tulovo	0.3446	0.32549	0.26541	0.41959	0.32953	0.37081	0.14006	0.31739	0.35997	0.32094	0.39055	0	0.26204	0.29535	0.25538	0.26312	0.25677	0.24442	0.26146	0.29983	0.25605	0.2641	0.25529	0.23675	0.23343	0.22082	0.24532	0.25779	0.22799	0.1853	0.22075	0.29648	0.21265	0.191	0.21835
North	Băsăşti	0.31339	0.28006	0.25129	0.37883	0.30855	0.31855	0.28004	0.27599	0.30738	0.27371	0.38001	0.31234	0	0.06189	0.06619	0.20889	0.17543	0.17738	0.19964	0.04026	0.18889	0.07076	0.19127	0.15454	0.16004	0.11896	0.13137	0.14416	0.12744	0.10302	0.18524	0.17912	0.13951	0.14059	0.15442
	Brădătel	0.31846	0.28651	0.24842	0.37774	0.31181	0.32409	0.289	0.28289	0.30997	0.27342	0.38989	0.32249	0.06848	0	0.10471	0.22141	0.18165	0.18696	0.20816	0.08866	0.21249	0.1086	0.21701	0.15974	0.14823	0.14251	0.15259	0.16127	0.14907	0.11601	0.19598	0.17503	0.15183	0.13753	0.16824
	Ciolanu	0.28083	0.25952	0.20448	0.32306	0.27889	0.29494	0.22621	0.25795	0.28424	0.24211	0.35073	0.26797	0.11365	0.12781	0	0.19004	0.18369	0.16412	0.18857	0.09052	0.18485	0.13077	0.18001	0.14889	0.16146	0.13352	0.12124	0.14532	0.13074	0.10318	0.17356	0.20638	0.13001	0.13731	0.15181
	Harsany	0.28349	0.25594	0.175	0.31899	0.27672	0.30524	0.22789	0.24961	0.27659	0.24235	0.34542	0.25873	0.2417	0.23364	0.17952	0	0.16919	0.13387	0.11988	0.22405	0.18547	0.1976	0.18705	0.14374	0.14441	0.11415	0.13769	0.15201	0.13594	0.10995	0.17223	0.19861	0.13131	0.10611	0.12732
	Joseni1	0.29135	0.26065	0.18563	0.32422	0.2842	0.30758	0.24201	0.24674	0.28325	0.24772	0.3441	0.27599	0.20418	0.19966	0.17551	0.15896	0	0.14463	0.15577	0.18878	0.03042	0.17391	0.14717	0.10904	0.10209	0.12735	0.09132	0.10842	0.10825	0.0833	0.12234	0.19142	0.09247	0.09681	0.12539
	Mănăşturel	0.25494	0.216	0.16182	0.30143	0.24276	0.26643	0.20215	0.2074	0.24515	0.21089	0.30187	0.24447	0.19803	0.19762	0.16054	0.12791	0.13504	0	0.158	0.19514	0.13966	0.15963	0.09241	0.12606	0.10783	0.10203	0.11477	0.12314	0.10324	0.07912	0.12845	0.15633	0.09173	0.07623	0.10438
	Olaszliszka	0.27294	0.24588	0.17445	0.33433	0.26965	0.29326	0.23246	0.23988	0.29026	0.24885	0.34342	0.26264	0.24095	0.23195	0.18939	0.12632	0.16595	0.16335	0	0.21005	0.17922	0.19124	0.18513	0.1518	0.14797	0.13639	0.14088	0.15613	0.12999	0.11204	0.17096	0.21173	0.14097	0.11009	0.13278
	Pădureni	0.30435	0.27131	0.23493	0.37878	0.3004	0.31022	0.2721	0.26852	0.30514	0.27181	0.382	0.31527	0.03789	0.07978	0.11141	0.23289	0.20425	0.19789	0.22713	0	0.21195	0.12985	0.23088	0.14971	0.17126	0.14222	0.14439	0.15532	0.13179	0.11039	0.19778	0.23408	0.15468	0.14863	0.15612
	Remetea1	0.30554	0.27292	0.21133	0.33634	0.29689	0.31876	0.25068	0.26401	0.29718	0.26183	0.35708	0.28048	0.21685	0.22548	0.18087	0.17925	0.03325	0.13924	0.18882	0.22216	0	0.18046	0.16204	0.12109	0.12436	0.14801	0.10723	0.13128	0.11917	0.10445	0.13735	0.2196	0.08926	0.13059	0.1498
	Rosilna	0.28068	0.24759	0.20363	0.33398	0.27372	0.29037	0.23974	0.25123	0.27916	0.23661	0.34568	0.26885	0.08289	0.10611	0.12613	0.18077	0.16047	0.14596	0.189	0.11877	0.1802	0	0.16195	0.15141	0.15905	0.1039	0.15234	0.157	0.14709	0.10437	0.18454	0.17063	0.13102	0.12249	0.13777
	Valea Ierii	0.29142	0.26569	0.19528	0.33334	0.28177	0.31286	0.22459	0.25686	0.29568	0.24826	0.34155	0.25973	0.2132	0.22453	0.16583	0.17035	0.14081	0.09232	0.19334	0.22957	0.16201	0.15271	0	0.16355	0.15861	0.13035	0.15595	0.17088	0.15034	0.11511	0.16722	0.19409	0.13488	0.10985	0.13134
Mon	Bolătău	0.26715	0.22796	0.178	0.31676	0.2547	0.27549	0.22562	0.21534	0.25141	0.23144	0.31538	0.26622	0.17812	0.17129	0.15121	0.15902	0.12712	0.11391	0.17855	0.16384	0.13676	0.15249	0.17137	0	0.07543	0.10102	0.02462	0.04338	0.03294	0.05856	0.08556	0.14861	0.03662	0.07946	0.09131
	Holda	0.2609	0.22432	0.15724	0.305	0.25157	0.27191	0.21879	0.21084	0.24743	0.2205	0.31373	0.25503	0.19406	0.17163	0.16358	0.14781	0.10143	0.10884	0.16061	0.18819	0.12486	0.15419	0.16084	0.08636	0	0.10043	0.058	0.05784	0.07583	0.0262	0.09564	0.11238	0.0422	0.0606	0.08908
	Lachowice	0.23133	0.21135	0.12075	0.27887	0.22709	0.2613	0.17027	0.20589	0.24737	0.1994	0.29367	0.21707	0.17992	0.18058	0.13713	0.10581	0.14111	0.11567	0.1295	0.17557	0.16268	0.11664	0.13364	0.13936	0.11959	0	0.09632	0.10775	0.09652	0.06546	0.12199	0.13929	0.09129	0.03623	0.06353
	Lăpuşna1	0.2593	0.2226	0.1747	0.32952	0.2449	0.27086	0.22355	0.21307	0.25576	0.22062	0.32475	0.25992	0.16483	0.17025	0.12649	0.14649	0.10897	0.10299	0.16061	0.15927	0.12405	0.14375	0.1521	0.02317	0.07061	0.12504	0	-0.01015	-0.01723	0.04342	0.09196	0.13573	0.03045	0.06391	0.07223
	Lăpuşna2	0.27293	0.23421	0.17899	0.34949	0.25654	0.28583	0.21558	0.2233	0.26945	0.22243	0.34994	0.26419	0.1827	0.17586	0.14221	0.15131	0.1282	0.10468	0.16871	0.16871	0.14071	0.15098	0.16372	0.05085	0.06655	0.12171	-0.00837	0	0.00608	0.0476	0.1087	0.1386	0.0607	0.05816	0.07805
	Lăpuşna3	0.22992	0.19244	0.13614	0.28082	0.22222	0.23809	0.20047	0.18906	0.22509	0.19599	0.29268	0.23058	0.15034	0.15063	0.11951	0.12792	0.10872	0.08725	0.1295	0.13348	0.12099	0.12699	0.13759	0.03139	0.07242	0.09804	-0.01897	-0.0018	0	0.0514	0.09515	0.11967	0.04736	0.07059	0.07226
	Pasul Pascanu	0.2231	0.18537	0.13666	0.27526	0.2127	0.22833	0.18386	0.1818	0.20844	0.18642	0.28141	0.22028	0.15327	0.14482	0.12368	0.12009	0.08156	0.08436	0.13266	0.14477	0.09625	0.11765	0.13313	0.0671	0.02191	0.09691	0.05852	0.0632	0.06018	0	0.06079	0.09895	0.02053	0.04085	0.03962
	Predeal	0.26906	0.2372	0.16684	0.3219	0.25964	0.28861	0.21779	0.22799	0.27403	0.2407	0.33221	0.24017	0.21902	0.21956	0.17581	0.1677	0.1443	0.12938	0.1751	0.20994	0.16324	0.17544	0.1662	0.09091	0.09648	0.12688	0.08941	0.09795	0.07844	0.08552	0	0.16018	0.06981	0.08783	0.10328
	Rakovets	0.28653	0.26303	0.1894	0.34356	0.27886	0.30947	0.238	0.25364	0.29754	0.25437	0.34623	0.27706	0.21289	0.20351	0.18701	0.1826	0.18384	0.1472	0.19461	0.23234	0.20722	0.16038	0.17703	0.15239	0.11384	0.12211	0.13154	0.13096	0.10809	0.11536	0.13338	0	0.11805	0.08774	0.12249
	Tazlău10	0.23695	0.20156	0.13757	0.28004	0.22768	0.24989	0.19738	0.19343	0.22875	0.19836	0.28898	0.22638	0.16684	0.16471	0.12609	0.12526	0.08705	0.08186	0.14115	0.16471	0.08981	0.12114	0.12753	0.04004	0.03401	0.09882	0.03038	0.05006	0.03419	0.02198	0.06055	0.10802	0	0.06861	0.07378
	Vyshkivsky Pass	0.1972	0.17487	0.10514	0.24884	0.18622	0.21814	0.14547	0.16345	0.20551	0.16668	0.23991	0.18841	0.17579	0.16561	0.13454	0.10782	0.10378	0.07489	0.10824	0.16374	0.13458	0.11427	0.10697	0.09511	0.07355	0.04166	0.07327	0.06617	0.06893	0.06149	0.08682	0.06329	0.06773	0	0.01906
	Zbyny	0.21858	0.19267	0.12735	0.28409	0.2038	0.23575	0.16696	0.19156	0.23344	0.19436	0.27015	0.21555	0.20446	0.20502	0.16128	0.13203	0.14552	0.11145	0.13536	0.18643	0.16377	0.14005	0.13957	0.1166	0.10749	0.06824	0.09163	0.09556	0.08021	0.07569	0.10526	0.11015	0.08144	0.01366	0

## Sheet: S10_Fst_TAP1
Table S10. Pairwise Fst values between populations in TAP1
		South												North								Mon
		Gjonce	Paliambela	Sagaiika	Thavmako	Demirbey3	Denizli2	Kuyumculu	Mollafeneri2	Kocabei	Ostar Kamak2	Subasi	Tulovo	Brădătel	Ciolanu	Pădureni	Rosilna	Harsany	Mănăşturel	Olaszliszka	Valea Ierii	Bolătău	Holda	Lachowice	Pasul Pascanu	Predeal	Rakovets	Vyshkivsky Pass	Zbyny
South	Gjonce	0
	Paliambela	0.067671	0
	Sagaiika	0.060805	0.069464	0
	Thavmako	0.084865	0.071642	0.15239	0
	Demirbey3	0.170127	0.090669	0.210341	0.150747	0
	Denizli2	0.211395	0.135928	0.219184	0.203359	0.067279	0
	Kuyumculu	0.193482	0.125524	0.213777	0.214859	0.041714	0.020925	0
	Mollafeneri2	0.198725	0.114135	0.22499	0.188882	0.069513	0.000866	0.053783	0
	Kocabei	0.418943	0.362154	0.417506	0.48129	0.381661	0.083957	0.213232	0.248732	0
	Ostar Kamak2	0.171352	0.084013	0.180763	0.172639	0.082479	0.012645	0.041435	0.041659	0.2258	0
	Subasi	0.329161	0.258004	0.330468	0.366324	0.244575	0.041765	0.109648	0.133081	0.035166	0.119741	0
	Tulovo	0.123223	0.075404	0.155783	0.120818	0.088357	0.137345	0.139185	0.14745	0.442084	0.097613	0.31521	0
North	Brădătel	0.132557	0.118048	0.153375	0.151569	0.134382	0.1818	0.144878	0.174625	0.366349	0.140124	0.28262	0.11485	0
	Ciolanu	0.101544	0.052248	0.119837	0.086917	0.025714	0.096149	0.048762	0.075579	0.276332	0.048626	0.190896	0.049258	0.052245	0
	Pădureni	0.093854	0.070492	0.116765	0.073749	0.012623	0.116557	0.05683	0.088021	0.273053	0.054132	0.201974	0	0.059104	0.017166	0
	Rosilna	0.15978	0.154825	0.176354	0.196257	0.197211	0.235563	0.215052	0.246199	0.465629	0.211046	0.366915	0.161794	0.065499	0.065149	0.014722	0
	Harsany	0.10348	0.079832	0.110687	0.124728	0.058608	0.122756	0.074468	0.11817	0.29519	0.075045	0.218642	0.032771	0.084092	0.051081	0.034197	0.112401	0
	Mănăşturel	0.076058	0.059774	0.089838	0.102335	0.066489	0.129557	0.073947	0.111939	0.29512	0.068797	0.21655	0.042874	0.044915	0.026669	0.038508	0.063896	0.018038	0
	Olaszliszka	0.110584	0.092077	0.135872	0.143431	0.102372	0.144997	0.126745	0.168444	0.413015	0.122821	0.307964	0.056332	0.09017	0.032639	0.00316	0.142815	0.018619	0.021294	0
	Valea Ierii	0.127059	0.091588	0.145135	0.10779	0.022107	0.10706	0.062948	0.097045	0.28761	0.065467	0.217239	0.014421	0.097337	0.045364	0.035129	0.114023	0.035723	0.060643	0	0
Mon	Bolătău	0.110666	0.08673	0.118864	0.125481	0.066601	0.136914	0.091826	0.137494	0.339891	0.091489	0.251875	0.024855	0.064032	0.037702	0.00399	0.072284	0.026192	0.031021	0.012394	0.019802	0
	Holda	0.099073	0.07529	0.128238	0.111645	0.045702	0.112668	0.061272	0.103496	0.296633	0.069283	0.212156	0.042048	0.035759	0.020022	0.031004	0.102109	0.029331	0.022816	0.01366	0.028044	0.018709	0
	Lachowice	0.105805	0.094836	0.132807	0.136955	0.088529	0.150593	0.111222	0.162955	0.380627	0.120663	0.287658	0.068078	0.065368	0.018882	0	0.081776	0.022624	0.016125	0.018092	0.014352	0.012551	0.010908	0
	Pasul Pascanu	0.135324	0.092711	0.163333	0.132401	0.025657	0.099596	0.041153	0.092725	0.264783	0.062943	0.183551	0.051537	0.062243	0.01561	0.017363	0.097002	0.044337	0.041003	0.029441	0.032769	0.028808	0.00849	0.019394	0
	Predeal	0.133406	0.078513	0.147619	0.129167	0.069085	0.101256	0.08099	0.111785	0.34103	0.079087	0.230838	0.083405	0.107327	0.014618	0.026879	0.160125	0.047327	0.031728	0.047797	0.016555	0.047763	0.030151	0.052977	0.030619	0
	Rakovets	0.088167	0.085714	0.110892	0.117214	0.069538	0.148048	0.089653	0.13683	0.316539	0.093984	0.246185	0.04156	0.042269	0.0325	0.017916	0.04005	0.035959	0.018323	0.001899	0.043234	0.016014	0.017418	0	0.024336	0.05696	0
	Vyshkivsky Pass	0.104728	0.077552	0.14176	0.116029	0.041642	0.119842	0.067309	0.111628	0.321686	0.07617	0.232566	0.039851	0.065647	0.025096	0.020347	0.108069	0.029516	0.026012	0	0.017078	0.021476	0.002834	0.004037	0.006649	0.033562	0.006866	0
	Zbyny	0.13106	0.10161	0.162762	0.156079	0.067214	0.128908	0.082612	0.148002	0.35954	0.104568	0.259614	0.066977	0.096139	0.023303	0.003073	0.139165	0.020683	0.028418	0.023569	0.003934	0.022902	0.009104	0.009701	0.004596	0.040753	0.011842	0	0

[truncated: 4 more sheets: S11_dxy_RND, S12_sim_res, S13_MHC_primers, S14_TAP1_primers]
